# Supplementary material for: Oxide Lu2TeO6 single crystals for X-ray detection with an ultralow detection limit
Source: Royal Society of Chemistry journal article supplement (doi:10.1039/d4tc04341c), 2024-11-12
Supplement: d4tc04341c1.pdf [file d4tc04341c1.pdf]

## Supplementary Information

**Oxide  $\text{Lu}_2\text{TeO}_6$  single crystal for X-ray detection with ultralow detection limit**

*Tingting Cao, Feifei Guo\*, Fuai Hu, Xutang Tao, Zeliang Gao\**

State Key Laboratory of Crystal Materials and school of Crystal Materials, Shandong

University, Jinan, 250100, China

Email: [gaozeliang@sdu.edu.cn](mailto:gaozeliang@sdu.edu.cn) (Zeliang Gao)

Email: [guofeifei@mail.sdu.edu.cn](mailto:guofeifei@mail.sdu.edu.cn) (Feifei Guo)

## 1. Supplementary figures

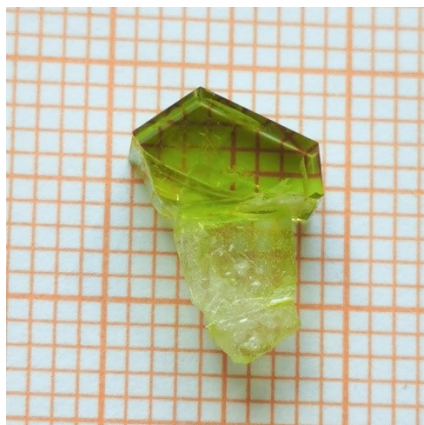

**Figure S1** Photograph of the as-grown Lu<sub>2</sub>TeO<sub>6</sub> single crystal.

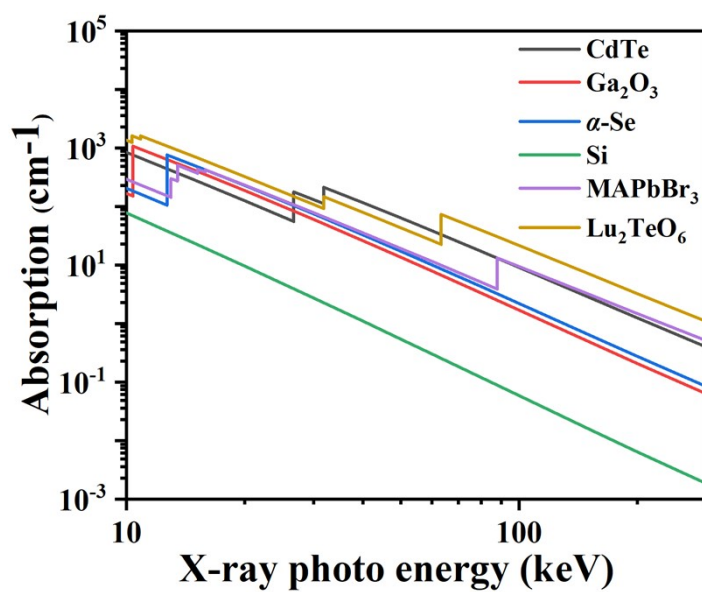

**Fig. S2** The X-ray absorption coefficients of Lu<sub>2</sub>TeO<sub>6</sub>, CdTe, Ga<sub>2</sub>O<sub>3</sub>, α-Se, Si, and MAPbBr<sub>3</sub>.

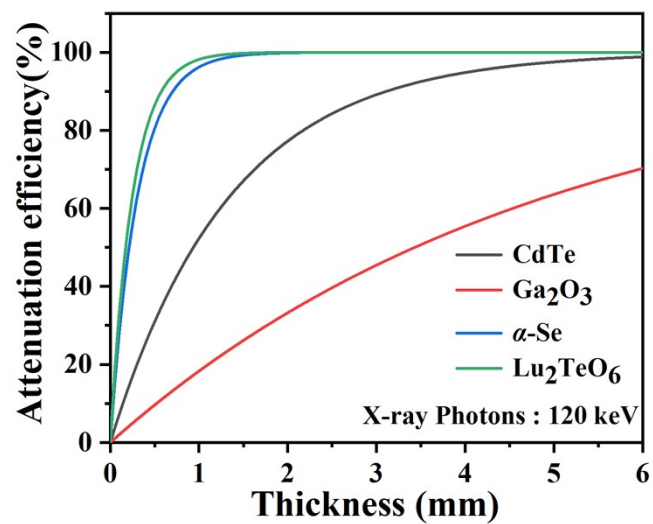

**Fig. S3** The thickness dependent attenuation efficiency of Lu<sub>2</sub>TeO<sub>6</sub> to 120 KeV X-ray photons.

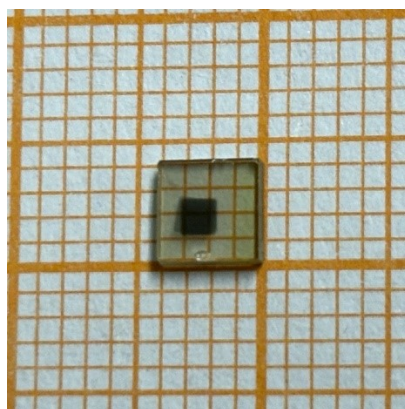

**Fig. S4** Photograph of the Lu<sub>2</sub>TeO<sub>6</sub> X-ray detector with Au/ Lu<sub>2</sub>TeO<sub>6</sub>/Au electrode structure.

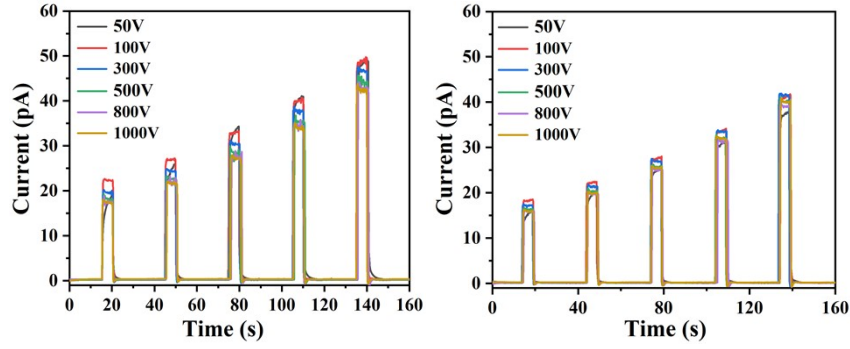

**Fig. S5** Temporal X-ray responses of the device based on the (100) (left) and (001) (right) wafers under voltages from 50 V to 1000 V at 40 keV.

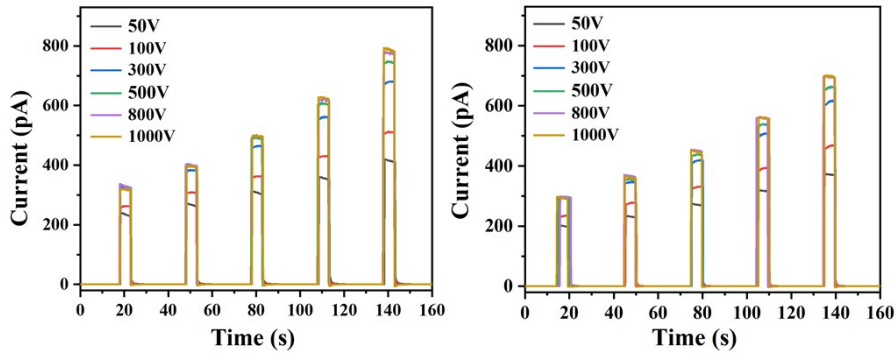

**Fig. S6** Temporal X-ray responses of the device based on the (100) (left) and (001) (right) wafers under voltages from 50 V to 1000 V at 120 keV.

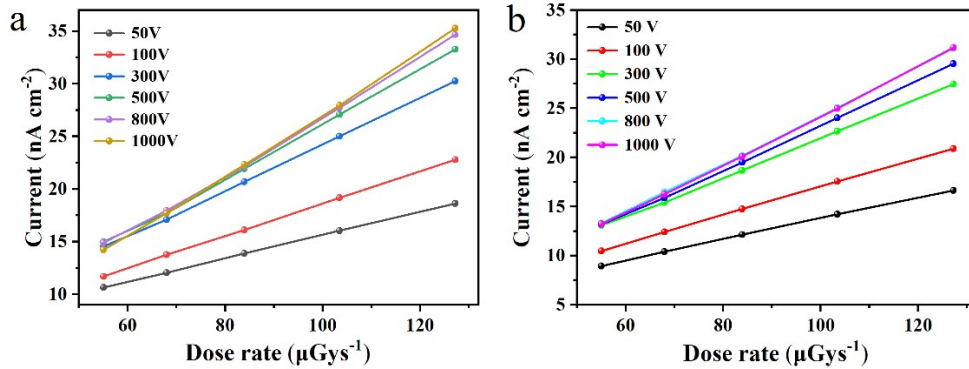

**Fig. S7** Photocurrent response at different biases under 120 keV X-ray various dose rates of the (a) (100) and (b) (001) detectors.
